# Supplementary material
Source: PubMed Central journal article supplement (PMC5728153)

## Supplemental Material

**Supplemental Table 1: Retention in care and optimal adherence to penicillin among**

**subjects with clinical RHD, by region.** N is number of patients in the denominator category and the following percentage is the proportion of patients retained or optimally adherent, respectively, with associated 95% confidence interval.

|                 | <b>Alive<br/>(N)</b> | <b>Retained<br/>(%)</b> | <b>Prescribed<br/>(N)</b> | <b>Optimally<br/>Adherent (%)</b> |
|-----------------|----------------------|-------------------------|---------------------------|-----------------------------------|
| <b>Central</b>  | 574                  | 46% (42-50%)            | 244                       | 91% (87-94%)                      |
| <b>Eastern</b>  | 104                  | 45% (36-55%)            | 42                        | 95% (83-99%)                      |
| <b>Northern</b> | 87                   | 75% (64-83%)            | 63                        | 90% (80-96%)                      |
| <b>Western</b>  | 122                  | 57% (48-65%)            | 56                        | 93% (82-97%)                      |

**Supplemental Figure 1: RHD Cascade of care for HIV+ patients.** The left axis and blue bars indicate the number of patients in each outcome category of the treatment cascade, while the right axis and orange points indicate the percentage of patients as a proportion of the parent (prior) category. Error bars reflect the 95% confidence interval. All patients in the registry were included to assess outcomes of “alive” and “retained”, but patients with borderline RHD were excluded from assessing the outcomes of “prescribed” and “adherent”.

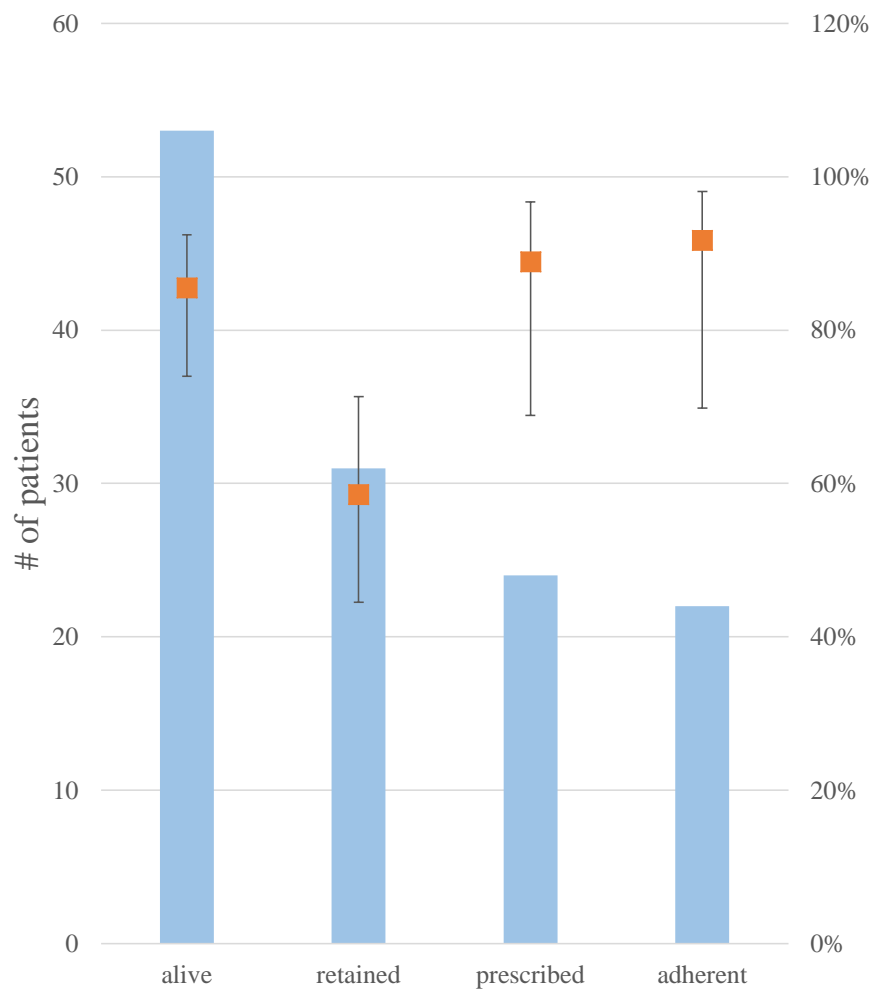

|                      |     |     |     |     |
|----------------------|-----|-----|-----|-----|
| Cascade category     | 53  | 31  | 24  | 22  |
| % of parent category | 86% | 59% | 89% | 92% |

**Supplemental Table 2: Association of demographic and clinical variables with retention in care among all subjects with clinical disease (n=966).** Bolded red: p<0.05. Hosmer-Lemeshow

test for goodness of fit (p=0.96). AUROC curve 0.682 (95% CI 0.643-0.720).

|                                                 | Unadjusted                        |                  | Multivariable                     |                  |
|-------------------------------------------------|-----------------------------------|------------------|-----------------------------------|------------------|
|                                                 | OR (95%CI)                        | p                | OR (95% CI)                       | p                |
| Age                                             |                                   |                  |                                   |                  |
| 0-15 years                                      | REF                               |                  | REF                               |                  |
| 15-25 years                                     | <b>0.52</b><br><b>(0.35-0.77)</b> | <b>0.001</b>     | 0.74<br>(0.44-1.24)               | 0.252            |
| 25-40 years                                     | <b>0.58</b><br><b>(0.39-0.86)</b> | <b>0.007</b>     | 0.80<br>(0.48-1.33)               | 0.394            |
| >40 years                                       | <b>0.50</b><br><b>(0.34-0.74)</b> | <b>0.001</b>     | 0.85<br>(0.51-1.41)               | 0.528            |
| Female (vs male)                                | 0.84<br>(0.63-1.11)               | 0.213            | 0.91<br>(0.63-1.30)               | 0.598            |
| Clinic site                                     |                                   |                  |                                   |                  |
| UHI                                             | REF                               |                  | REF                               |                  |
| Lubowa                                          | <b>16.7</b><br><b>(3.93-70.7)</b> | <b>&lt;0.001</b> | <b>16.7</b><br><b>(3.85-72.3)</b> | <b>&lt;0.001</b> |
| Mbarara                                         | <b>23.1</b><br><b>(5.52-96.5)</b> | <b>&lt;0.001</b> | <b>35.4</b><br><b>(4.6-271.0)</b> | <b>0.001</b>     |
| Gulu                                            | <b>3.9</b><br><b>(2.23-6.90)</b>  | <b>&lt;0.001</b> | <b>5.55</b><br><b>(1.94-15.9)</b> | <b>0.001</b>     |
| Distance to the nearest health centre (per km)  | <b>0.93</b><br><b>(0.90-0.97)</b> | <b>&lt;0.001</b> | <b>0.95</b><br><b>(0.92-0.99)</b> | <b>0.006</b>     |
| Household size (per person)                     | <b>0.94</b><br><b>(0.91-0.98)</b> | <b>0.008</b>     | --                                | --               |
| Employed or Employed Caregiver (vs. not)        | <b>1.38</b><br><b>(1.03-1.87)</b> | <b>0.033</b>     | --                                | --               |
| Limited Education (vs. more advanced education) | 0.80<br>(0.62-1.03)               | 0.084            | <b>0.57</b><br><b>(0.41-0.79)</b> | <b>0.001</b>     |
| NYHA Class                                      |                                   |                  |                                   |                  |
| NYHA I                                          | REF                               |                  |                                   |                  |
| NYHA II                                         | <b>1.61</b><br><b>(1.15-2.24)</b> | <b>0.005</b>     | <b>1.62</b><br><b>(1.11-2.37)</b> | <b>0.013</b>     |
| NYHA III                                        | 1.32<br>(0.85-2.04)               | 0.214            | 0.91<br>(0.54-1.52)               | 0.708            |
| NYHA IV                                         | <b>2.00</b><br><b>(1.05-3.80)</b> | <b>0.034</b>     | 1.38<br>(0.63-3.02)               | 0.413            |
| History of Decompensated HF                     | 0.94<br>(0.70-1.27)               | 0.707            | --                                | --               |
| History of Stroke                               | 0.82<br>(0.41-1.60)               | 0.554            | --                                | --               |

|                                |                     |       |    |    |
|--------------------------------|---------------------|-------|----|----|
| History of Atrial Fibrillation | 0.98<br>(0.60-1.60) | 0.936 | -- | -- |
| History of Endocarditis        | 0.81<br>(0.25-2.67) | 0.732 | -- | -- |
| History of Prior Valve Surgery | 1.13<br>(0.62-2.07) | 0.693 | -- | -- |
| HIV infected                   | 1.41<br>(0.99-2.00) | 0.058 | -- | -- |

**Supplemental Table 3: Association of demographic and clinical variables with adherence to penicillin among all subjects with clinical disease who were retained in care (n=470).**

Bolded red: p<0.05. Hosmer-Lemeshow test for goodness of fit (p=0.43). AUROC curve 0.693 (95% CI 0.632-0.754).

|                                                 | Unadjusted                        |              | Multivariable                     |              |
|-------------------------------------------------|-----------------------------------|--------------|-----------------------------------|--------------|
|                                                 | OR (95%CI)                        | P            | OR (95% CI)                       | P            |
| Age                                             |                                   |              |                                   |              |
| 0-15 years                                      | REF                               |              | REF                               |              |
| 15-25 years                                     | 1.08<br>(0.43-2.72)               | 0.863        | 1.55<br>(0.59-4.08)               | 0.374        |
| 25-40 years                                     | <b>0.37</b><br><b>(0.17-0.80)</b> | <b>0.012</b> | 0.52<br>(0.22-1.22)               | 0.132        |
| >40 years                                       | <b>0.37</b><br><b>(0.17-0.82)</b> | <b>0.014</b> | 0.43<br>(0.18-1.00)               | 0.051        |
| Female (vs male)                                | 0.86<br>(0.49-1.50)               | 0.588        | 1.00<br>(0.55-1.82)               | 0.994        |
| Clinic site                                     |                                   |              |                                   |              |
| UHI                                             | REF                               |              | REF                               |              |
| Lubowa                                          | 1.67<br>(0.49-5.74)               | 0.414        | 1.58<br>(0.43-5.81)               | 0.488        |
| Mbarara                                         | 1.89<br>(0.56-6.43)               | 0.308        | 0.85<br>(0.21-3.38)               | 0.819        |
| Gulu                                            | 2.05<br>(0.78-5.36)               | 0.143        | 1.19<br>(0.43-3.34)               | 0.735        |
| Distance to the nearest health centre (per km)  | 1.00<br>(0.94-1.07)               | 0.995        | --                                | --           |
| Household size (per person)                     | 1.06<br>(0.97-1.16)               | 0.200        | --                                | --           |
| Employed or Employed Caregiver (vs. not)        | <b>0.51</b><br><b>(0.30-0.86)</b> | <b>0.011</b> | --                                | --           |
| Limited Education (vs. more advanced education) | <b>2.26</b><br><b>(1.33-3.82)</b> | <b>0.002</b> | <b>2.20</b><br><b>(1.24-3.92)</b> | <b>0.007</b> |
| NYHA Class                                      |                                   |              |                                   |              |
| NYHA I                                          | REF                               |              | REF                               |              |
| NYHA II                                         | 1.16<br>(0.60-2.24)               | 0.662        | --                                | --           |
| NYHA III                                        | 1.09<br>(0.45-2.63)               | 0.843        | --                                | --           |
| NYHA IV                                         | 0.64<br>(0.22-1.89)               | 0.422        | --                                | --           |
| History of Decompensated HF                     | 0.98<br>(0.55-1.73)               | 0.942        | --                                | --           |

|                                |                                   |              |                                   |              |
|--------------------------------|-----------------------------------|--------------|-----------------------------------|--------------|
| History of Stroke              | 0.67<br>(0.17-2.61)               | 0.568        | --                                | --           |
| History of Atrial Fibrillation | 0.75<br>(0.30-1.87)               | 0.535        | --                                | --           |
| History of Endocarditis        | 1.48<br>(0.20-10.9)               | 0.701        | --                                | --           |
| History of Prior Valve Surgery | <b>0.28</b><br><b>(0.12-0.68)</b> | <b>0.005</b> | <b>0.32</b><br><b>(0.12-0.87)</b> | <b>0.026</b> |
| HIV infected                   | 1.42<br>(0.76-2.64)               | 0.269        | --                                | --           |

**Supplemental Figure 2: Sensitivity analysis excluding patients recently enrolled (< 90**

**days).** The left axis and blue bars indicate the number of patients in each outcome category of the treatment cascade, while the right axis and orange points indicate the percentage of patients as a proportion of the parent (prior) category. Error bars reflect the 95% confidence interval. All patients in the registry were included to assess outcomes of “alive” and “retained”, but patients with borderline RHD were excluded from assessing the outcomes of “prescribed” and “adherent”.

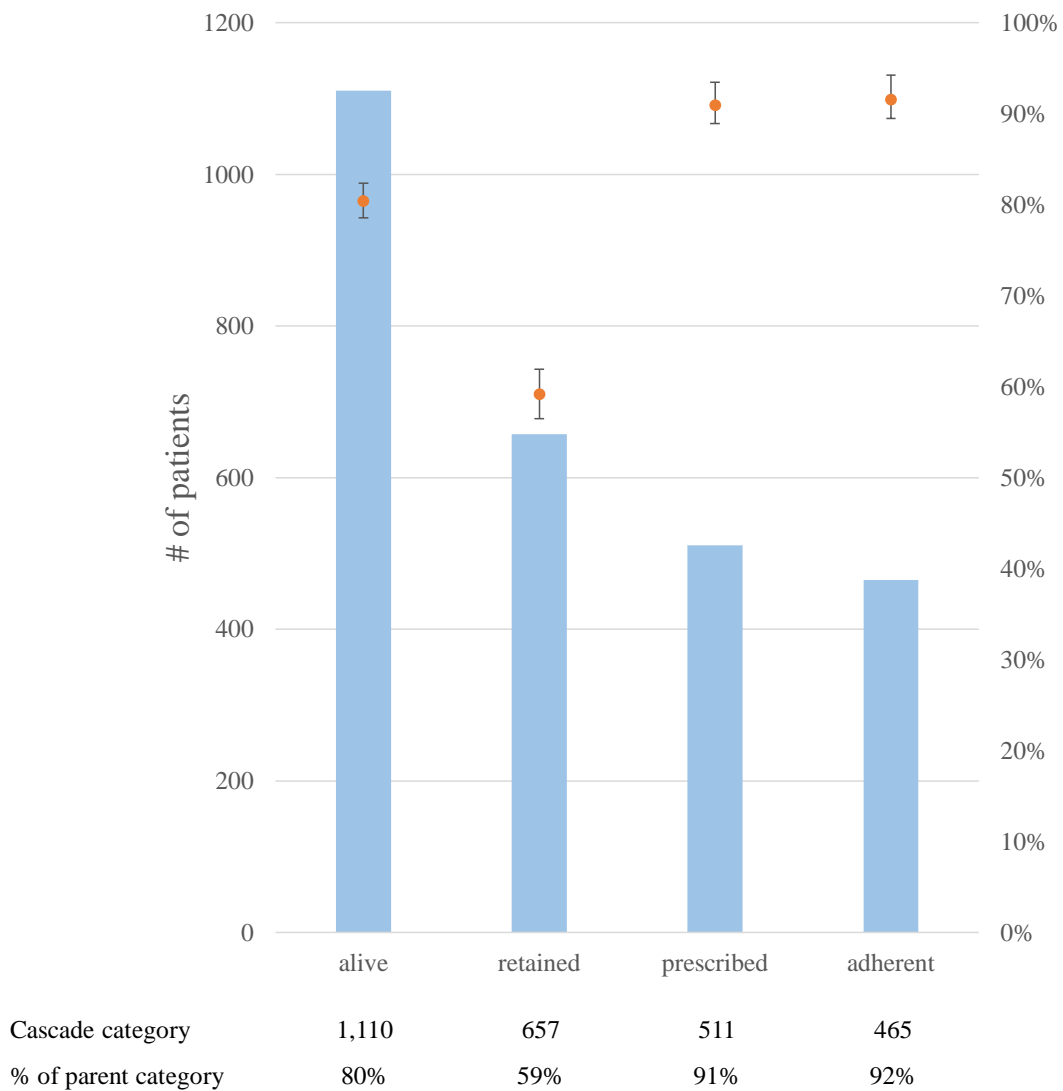

Supplement: NIHMS915289-supplement-Supplemental_Material.pdf [file NIHMS915289-supplement-Supplemental_Material.pdf]
